# Supplementary material for: Angiogenesis is Inhibited by Arsenic Trioxide Through Downregulation of the CircHIPK3/miR-149-5p/FOXO1/VEGF Functional Module in Rheumatoid Arthritis
Source: PubMed Central journal article supplement (PMC8579003; doi:10.3389/fphar.2021.751667), 2021-10-27
Supplement: DataSheet1.pdf [file DataSheet1.pdf]

### Supplementary Figure 1

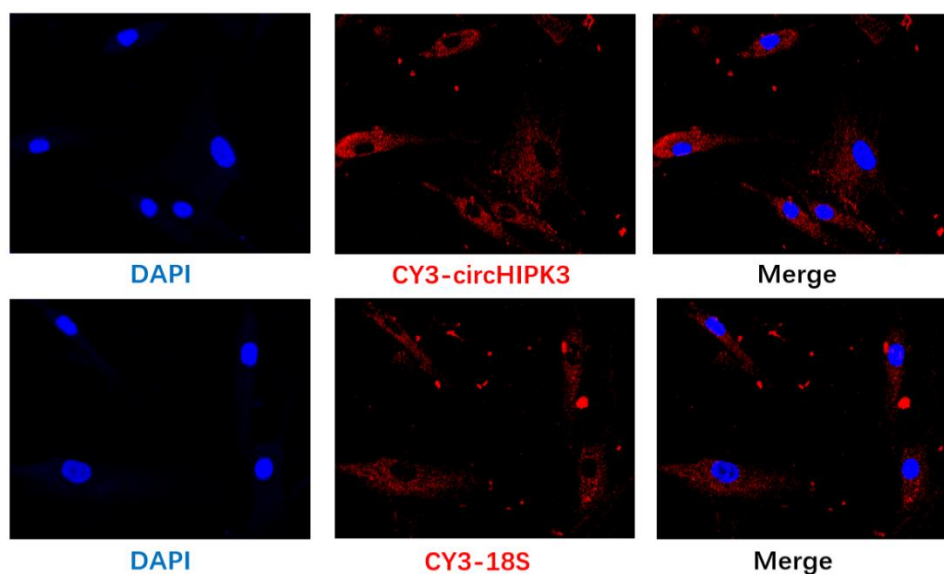

### Supplementary Figure 1. Confirmation of circHIPK3 located in the cytoplasm.

FISH demonstrated the main location of circHIPK3 in the cytoplasm (n=3; red, circHIPK3; blue, DAPI nuclear staining).

### Supplementary Figure 2

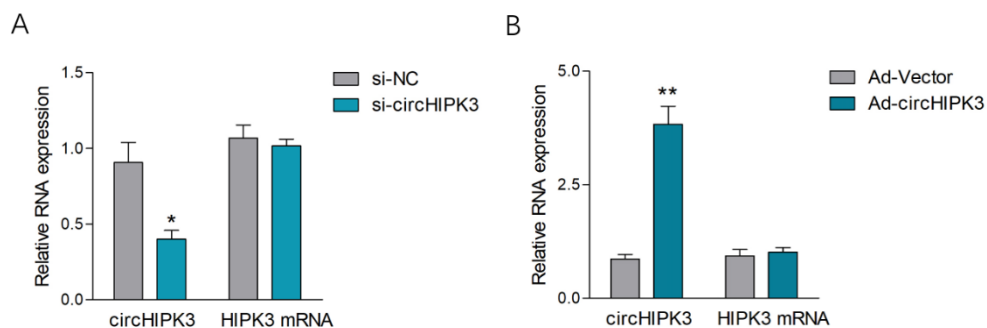

### Supplementary Figure 2. Efficiency of circHIPK3 overexpression and knockdown.

The knockdown (A) and overexpression (B) of circHIPK3 was determined by qRT-PCR. 60% knockdown and 4-fold overexpression efficiency was achieved, while the expression of linear HIPK3 mRNA was not significantly influenced. (n = 3; \*p < 0.05, \*\*p < 0.01). Data are expressed as the mean  $\pm$  SEM.

### Supplementary Figure 3. Spliced sequence of circHIPK3 (hsa\_circ\_0000284).

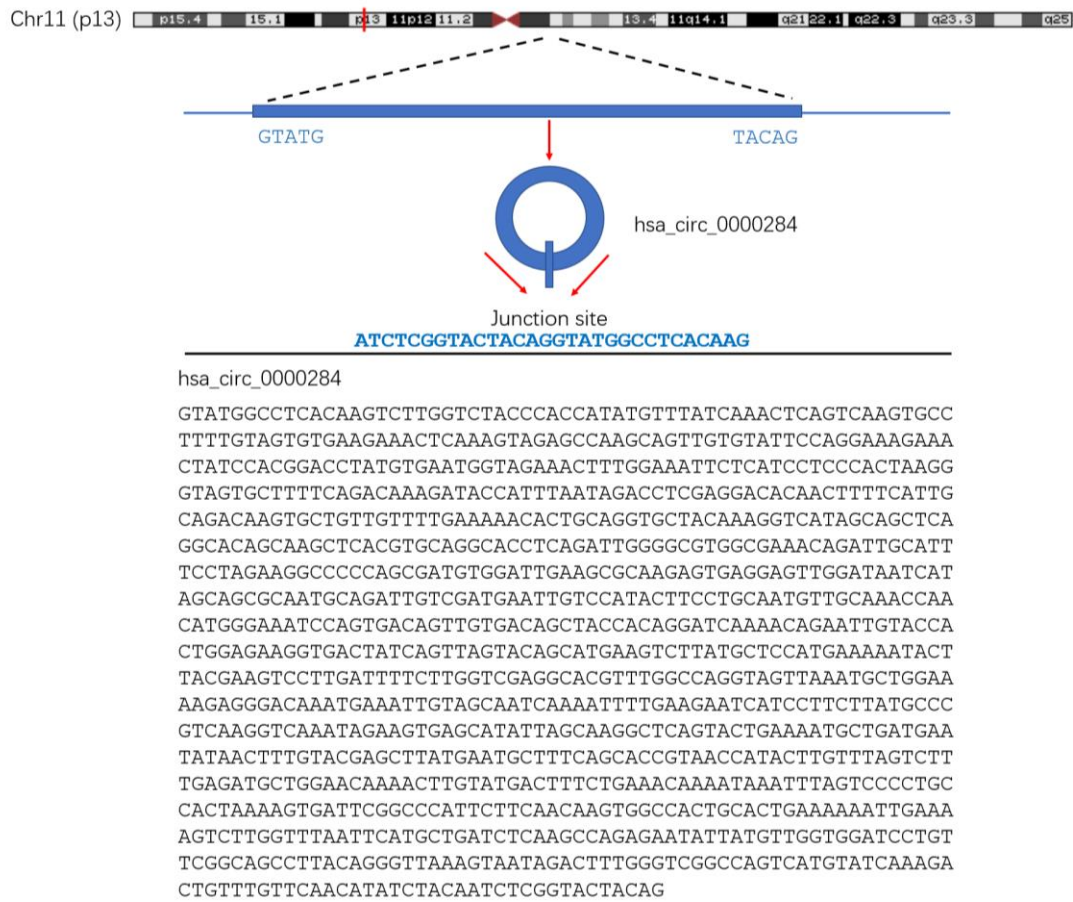

### Supplementary Figure 4

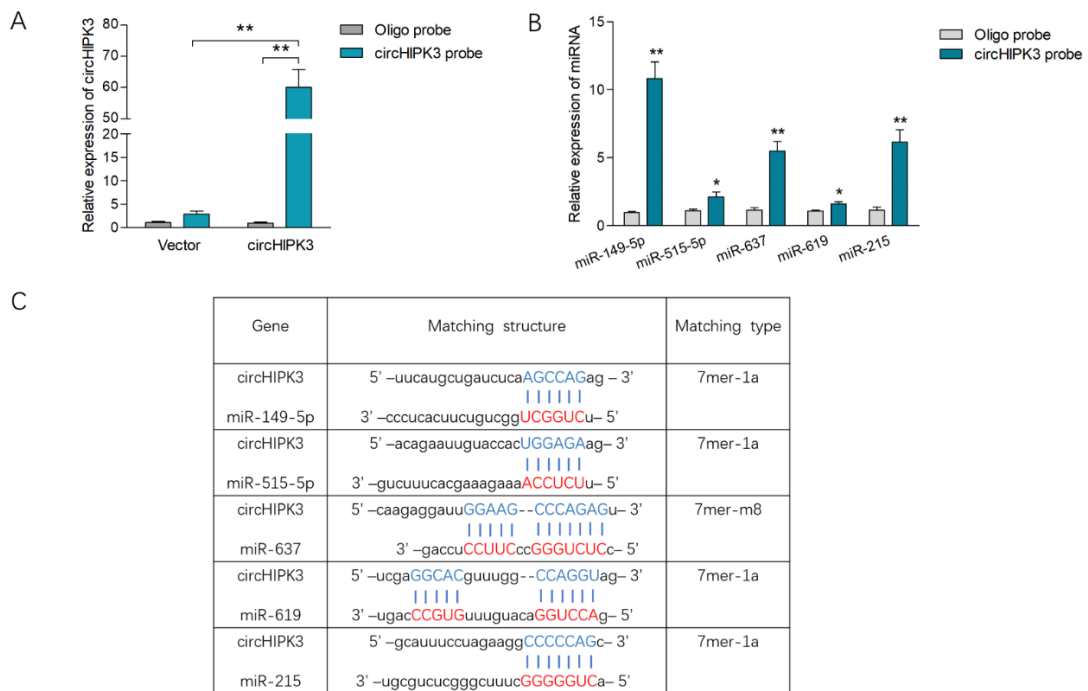

| Gene       | Matching structure                                 | Matching type |
|------------|----------------------------------------------------|---------------|
| circHIPK3  | 5' -uuc <u>a</u> ugcugaucuca <u>AGCCAG</u> ag - 3' | 7mer-1a       |
| miR-149-5p | 3' -cccucacuucugucgg <u>UCGGUC</u> u- 5'           |               |
| FOXO1      | 5' -AAGAUUCCUACAGUA <u>AGCCAG</u> C- 3'            | 6mer          |

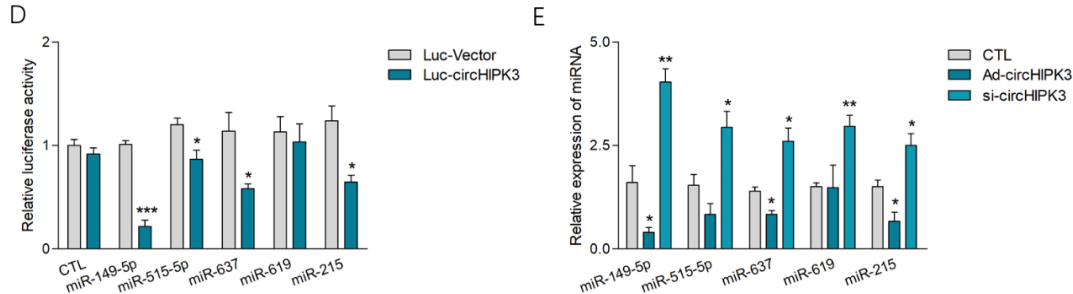

### Supplementary Figure 4. MiRNAs selection influenced by circHIPK3.

(A) Pull-down efficiency. Relative levels of circHIPK3 pulled down by the circHIPK3 probe were normalized to the level of circHIPK3 pulled down by an oligo probe. (n=3; \*\*p<0.01). (B) qRT-PCR quantification of the circHIPK3-bound 5 miRNA candidates pulled down in the cell lysates. (n=3; \*p<0.05, \*\*p<0.01). (C) At least one miRNA-binding site defined by the Arraystar Proprietary Algorithms was confirmed using the CircInteractome database. The schematic graph illustrated binding sites between circHIPK3 and miR-149-5p, miR-149-5p and FOXO1 mRNA predicted by bioinformatics methods. (D) Relative luciferase activity of circHIPK3 luciferase reporter after co-transfection with indicated 4 miRNA mimics. (n=3; \*p<0.05, \*\*\*p<0.001). (E) qRT-PCR analysis showed that downregulating circHIPK3 increased miRNAs expression, while upregulating circHIPK3 decreased miRNAs expression, but miR-149-5p was the most significant one. (n=3; \*p<0.05, \*\*p<0.01). Data are expressed as the mean ± SEM.

### Supplementary Figure 5. Wild type and mutated putative binding sites of circHIPK3 and FOXO1 for luciferase reporter assay.

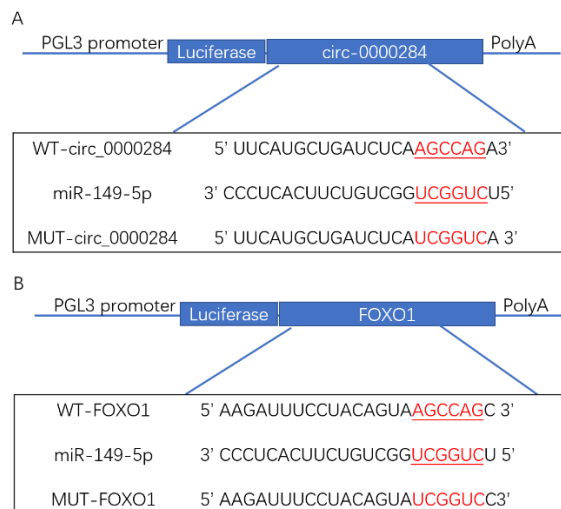

## Supplementary Figure 6

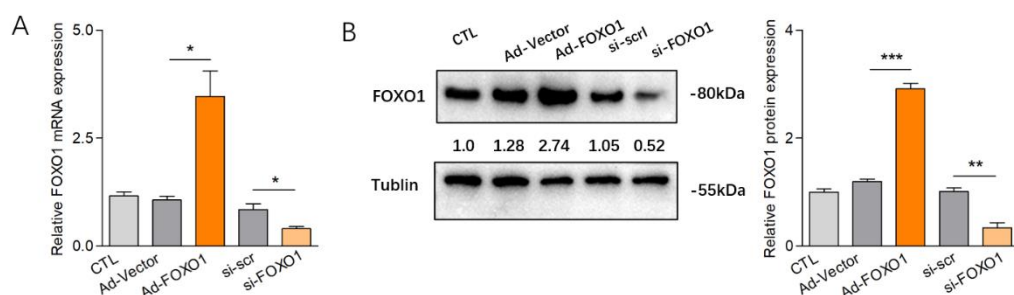

### Supplementary Figure 6. Overexpression and silencing of FOXO1.

Both overexpression (A) and silencing (B) of FOXO1 were constructed in RA-FLS, and the stable transfection efficiency of FOXO1 were shown. (n=3; \*p<0.05, \*\*p<0.01, \*\*\*p<0.001). Data are expressed as the mean  $\pm$  SEM.

## Supplementary Figure 7

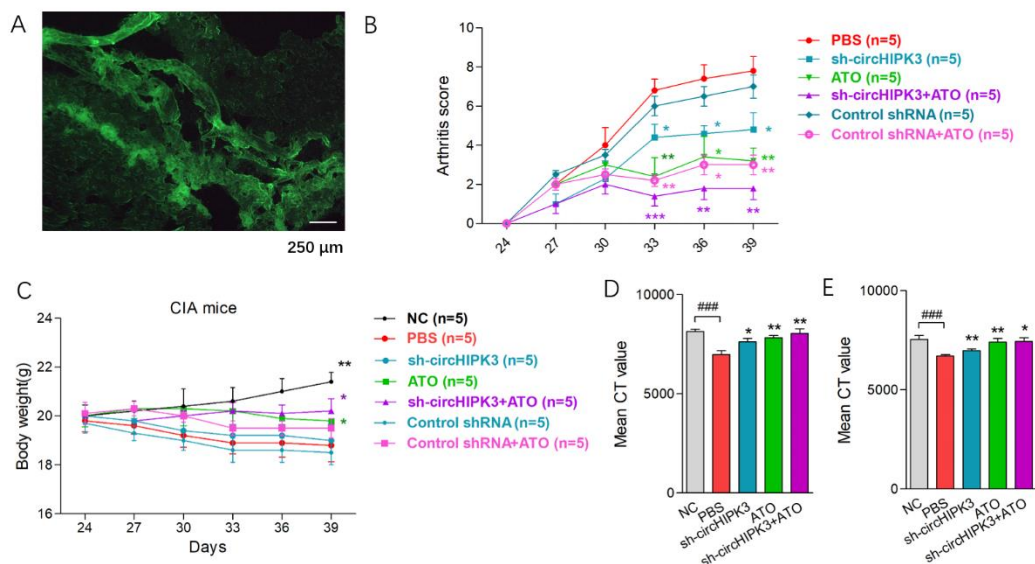

### Supplementary Figure 7. Results of shRNA viral vectors control, body-weight of mice, mean values of micro-CT.

(A) AAV-sh-CMV-EGFP viral vectors as a control were intra-articularly administered to CIA mice, and AAV effectively transduced into synovial tissue, displaying a local distribution pattern. (B) AAV vector control AAV-sh-CMV-EGFP management had no significant effect on CIA arthritis and the ATO's curative effect. (n= 5; \*p < 0.05, \*\*p < 0.01, \*\*\*p < 0.001 versus PBS treatment group). (C) Body-weight loss was recorded to evaluate the curative effects and toxicity of ATO and AAV-sh-circHIPK3 injection. PBS-treated CIA mice showed a significant decrease in weight compared with the normal control group. ATO at 2.0 mg/kg/day as well as the combination therapy of ATO and AAV-sh-circHIPK3 injection significantly increased body-weight. Furthermore there was no significant difference of body-weight between combination therapy group and normal control group. There was no significant difference of body-weight between shRNA control and PBS-treated group, ATO+ shRNA-control group and ATO group. (n= 5; \*p < 0.05, \*\*p < 0.01 versus PBS treatment

group). Mean CT values of paws (D) and knees (E) were evaluated and consistent with the trends toward changes of micro-CT images. (n= 5; \*p < 0.05, \*\*p < 0.01 versus PBS treatment group; ### p < 0.001 versus NC). Data are expressed as the mean ± SEM.

### Supplementary Figure 8

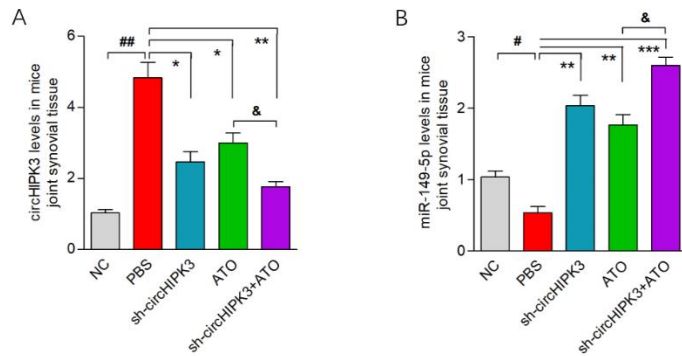

### Supplementary Figure 8. Synovial circHIPK3 and miR-149-5p levels in CIA mice joint.

The expression levels of circHIPK3 (A) and miR-149-5p (B) in mice knee joint tissues were detected by qRT-PCR. (n= 5; \*p < 0.05, \*\*p < 0.01, \*\*\*p < 0.001 versus PBS treatment group; # p < 0.05, ## p < 0.01 versus NC; & p < 0.05 versus ATO group). Data are expressed as the mean ± SEM. NC = normal control group.

### Supplementary Table 1 (Table S 1). Primers and probes used in the study.

| Gene             | Sequence                                                           |
|------------------|--------------------------------------------------------------------|
| hsa_circ_0000284 | 5'-TATGTTGGTGGATCC TGTTTCGGCA-3'<br>3'-TGGTGGGTAGACCAAGACTTGTGA-5' |
| HIPK3            | 5'-ACATTGGAAGAGCATGAGGCAGAGA-3'<br>3'-CTGCTGAAAAGCATCACCACAACCA-5' |
| miR-149-5p       | 5'-CCCTCATTCTGTGCCACACTCCAGCTGGG-3'<br>3'-TGGTGTCGTGGAGTCG-5'      |
| FOXO1            | 5'-CAGCAAATCAAGTTATGGAGGA-3'<br>3'-TATCATTGTGGGGAGGAGAGTC-5'       |
| VEGF             | 5'-TTCTGGGCTGTTCTCGCTTC-3'<br>3'-CTCTCCTCTTCTTCTTCTTCC-5'          |
| GAPDH            | 5'-GCACCGTCAAGGCTGAGAAC-3'<br>3'-TGGTGAAGACGCCAGTGA-5'             |
| U6               | 5'-GTAGATACTGCAGTACG-3'<br>3'-ATCGCATGACGTACCTGAGC-5'              |

**circRIP probes**

---

|                  |                                                              |
|------------------|--------------------------------------------------------------|
| hsa_circ_0000284 | 5'-ACCAAGACTTGTGAGGCCATACCTGTAGTAC<br>CGAGATTGTAGA-3'-biotin |
| Control          | 5'-CTTCGAGGTACAGGAGTTCGAATGCACCACA<br>AAGACATTCA-3'-biotin   |

---

**FISH probes**

---

|                  |                                     |
|------------------|-------------------------------------|
| hsa_circ_0000284 | 5'-CY3-TTGTGAGGCCATACCTGTAGTACCG-3' |
|------------------|-------------------------------------|

---

**siRNAs**

---

|                 |                                                          |
|-----------------|----------------------------------------------------------|
| si-circ_0000284 | 5'-TAGAAGACCATGGGGGATA-3'                                |
| linearHIPK3     | 5'-GCUGAUUGAUGCAGAUUUUA-3'                               |
| si-FOXO1        | 5'-GCCAAGCCCACAUAUCATT-3'<br>5'-UGAUUAUGUGGGUCUUGGCTT-3' |
| si-NC           | 5'-UUCUCCGAACGUGUCACGU-3'                                |

---

---

|                      |         |
|----------------------|---------|
| miR-149-5p mimic     | RiboBio |
| miR-149-5p inhibitor | RiboBio |

---
